# Supplementary material for: Economic Evaluation of Direct-Acting Antivirals for Hepatitis C in Norway
Source: PubMed Central journal article supplement — Pharmacoeconomics. 2018 Feb 2;36(5):591–601. doi: 10.1007/s40273-017-0604-3 (PMC5906515; doi:10.1007/s40273-017-0604-3), 2018-02-02
Supplement: 40273_2017_604_MOESM1_ESM.pdf [file 40273_2017_604_MOESM1_ESM.pdf]

#Costs parameters

#Declare input parameters for costs

cDrg2016Mean<-42081  
cDrg2016Se<-cDrg2016Mean/10  
wDrg907A<-0.038  
wDrg856G<-0.2  
wDrg9070<-0.059  
wDrg199<-3.678  
wDrg203<-1.147  
wDrg202<-1.51  
wDrg480<-26.215  
wDrg7110<-0.047  
wDrg806P<-0.035  
cFee2ad<-143  
cFee2dd<-94  
cRefUltra<-30  
cOwnUltra<-227  
cOwnOutput<-320  
cFee704e<-23  
cFee701b<-51  
cFee701c<-84  
cFee701e<-27  
cFee701g<-221  
cFee704q<-120  
cFee707a<-4  
cCapFee<-427

#Run simulations for cost parameters. Logic based on Tollefsen report, Oslo Economics

cDrg2016<-rgamma(n,(cDrg2016Mean^2)/(cDrg2016Se^2),cDrg2016Mean/(cDrg2016Se^2))  
pPaydByPat<-0.4 #40% standard percentage  
nAvgVisit<-rgamma(n,(4^2)/(0.4^2),4/(0.4^2)) #Assume SE=mean/10  
n707aLab<-rgamma(n,(6^2)/(0.6^2),6/(0.6^2)) #Assume SE=mean/10  
nRnaPcr<-rgamma(n,(2^2)/(0.2^2),2/(0.2^2)) #Assume SE=mean/10  
nAcuteGp<-rgamma(n,(1^2)/(0.1^2),1/(0.1^2)) #Assume SE=mean/10  
nAcuteOutput<-rgamma(n,(1.5^2)/(0.15^2),1.5/(0.15^2)) #Assume SE=mean/10  
nAcuteLabR<-rgamma(n,(2^2)/(0.2^2),2/(0.2^2)) #Assume SE=mean/10  
pChronTreat<-0.17  
pMild<-rbeta(n,16180,7020) #Oslo Economics report, p37  
pComp<-rbeta(n,2080,520) #Oslo Economics report, p37  
nMildTreatGp<-rgamma(n,(4.5^2)/(0.45^2),4.5/(0.45^2)) #Assume SE=mean/10  
nMildTreatOutput<-rgamma(n,(4.5^2)/(0.45^2),4.5/(0.45^2)) #Assume SE=mean/10  
nMildNoLabRna<-rgamma(n,(1^2)/(0.1^2),1/(0.1^2)) #Assume SE=mean/10  
nMildNoLabRna<-rgamma(n,(1.5^2)/(0.15^2),1.5/(0.15^2)) #Assume SE=mean/10  
nModTreatGp<-rgamma(n,(4.5^2)/(0.45^2),4.5/(0.45^2)) #Assume SE=mean/10  
nModTreatOutput<-rgamma(n,(4.5^2)/(0.45^2),4.5/(0.45^2)) #Assume SE=mean/10  
nModTreatLabRna<-rgamma(n,(3^2)/(0.3^2),3/(0.3^2)) #Assume SE=mean/10  
nModTreatLabPck<-rgamma(n,(3^2)/(0.3^2),3/(0.3^2)) #Assume SE=mean/10  
nModNoLabRna<-rgamma(n,(1^2)/(0.1^2),1/(0.1^2)) #Assume SE=mean/10  
nCompTreatGp<-rgamma(n,(5.5^2)/(0.55^2),5.5/(0.55^2)) #Assume SE=mean/10  
nCompTreat907<-rgamma(n,(10^2)/(1^2),10/(1^2)) #Assume SE=mean/10  
nCompTreatLabRna<-rgamma(n,(5^2)/(0.5^2),5/(0.5^2)) #Assume SE=mean/10  
nCompTreatLabPck<-rgamma(n,(5^2)/(0.5^2),5/(0.5^2)) #Assume SE=mean/10  
nCompTreatUlt<-rgamma(n,(1^2)/(0.1^2),1/(0.1^2)) #Assume SE=mean/10  
nCompTreatGas<-rgamma(n,(0.5^2)/(0.05^2),0.5/(0.05^2)) #Assume SE=mean/10  
nCompNoGp<-rgamma(n,(3^2)/(0.3^2),3/(0.3^2)) #Assume SE=mean/10  
nCompNo907<-rgamma(n,(2^2)/(0.2^2),2/(0.2^2)) #Assume SE=mean/10  
nCompNoLabRna<-rgamma(n,(1^2)/(0.1^2),1/(0.1^2)) #Assume SE=mean/10  
nCompNoLabPck<-rgamma(n,(1^2)/(0.1^2),1/(0.1^2)) #Assume SE=mean/10  
nCompNoUlt<-rgamma(n,(1^2)/(0.1^2),1/(0.1^2)) #Assume SE=mean/10  
nCompNoGas<-rgamma(n,(1^2)/(0.1^2),1/(0.1^2)) #Assume SE=mean/10  
nDeCompGp<-rgamma(n,(5.5^2)/(0.55^2),5.5/(0.55^2)) #Assume SE=mean/10  
nDeComp907<-rgamma(n,(9^2)/(0.9^2),9/(0.9^2)) #Assume SE=mean/10  
nDeComp202<-rgamma(n,(3.5^2)/(0.35^2),3.5/(0.35^2)) #Assume SE=mean/10  
nDeCompRna<-rgamma(n,(2^2)/(0.2^2),2/(0.2^2)) #Assume SE=mean/10  
nDeCompLab<-rgamma(n,(5^2)/(0.5^2),5/(0.5^2)) #Assume SE=mean/10  
nDeCompUlt<-rgamma(n,(1^2)/(0.1^2),1/(0.1^2)) #Assume SE=mean/10  
nDeCompGas<-rgamma(n,(0.5^2)/(0.05^2),0.5/(0.05^2)) #Assume SE=mean/10  
nDeCompAsc<-rgamma(n,(0.5^2)/(0.05^2),0.5/(0.05^2)) #Assume SE=mean/10  
nHccGp<-rgamma(n,(5^2)/(0.5^2),5/(0.5^2)) #Assume SE=mean/10  
nHcc856<-rgamma(n,(12^2)/(1.2^2),12/(1.2^2)) #Assume SE=mean/10  
nHcc199<-rgamma(n,(3^2)/(0.3^2),3/(0.3^2)) #Assume SE=mean/10  
nHcc203<-rgamma(n,(6^2)/(0.6^2),6/(0.6^2)) #Assume SE=mean/10  
nHccRna<-rgamma(n,(2^2)/(0.2^2),2/(0.2^2)) #Assume SE=mean/10  
nHccLab<-rgamma(n,(5^2)/(0.5^2),5/(0.5^2)) #Assume SE=mean/10  
nTxGp<-rgamma(n,(18^2)/(1.8^2),18/(1.8^2)) #Assume SE=mean/10  
nTx907<-rgamma(n,(2.5^2)/(0.25^2),2.5/(0.25^2)) #Assume SE=mean/10  
nTx202<-rgamma(n,(2^2)/(0.2^2),2/(0.2^2)) #Assume SE=mean/10  
nTxRna<-rgamma(n,(1^2)/(0.1^2),1/(0.1^2)) #Assume SE=mean/10  
nTxLab<-rgamma(n,(1^2)/(0.1^2),1/(0.1^2)) #Assume SE=mean/10  
nTrGp<-rgamma(n,(10^2)/(1^2),10/(1^2)) #Assume SE=mean/10  
nTr907<-rgamma(n,(10^2)/(1^2),10/(1^2)) #Assume SE=mean/10  
nTr480<-rgamma(n,(2^2)/(0.2^2),2/(0.2^2)) #Assume SE=mean/10  
salaryNurse<-rgamma(n,(471600^2)/(4716^2),471600/(4716^2)) #SSB.no for mean, assume SE=1/100th of mean  
salaryDoctor<-rgamma(n,(830400^2)/(8304^2),830400/(8304^2)) #SSB.no for mean, assume SE=1/100th of mean  
pIndirect<-rep(0,n)

if(perspective=="healthcare") pIndirect<-rbeta(n,214,1000-214) #Estimate 21.4% from SSB.no, SE is guesstimate  
cNurse<-salaryNurse/(1-pIndirect)  
pNurseIvdu<-rbeta(n,5,100-5) #Olav Dalgard estimated 1 nurse treat 20 per year. SE based on assumption (wide uncertainty)  
cDoctor<-salaryDoctor/(1-pIndirect)  
pDoctor<-rbeta(n,5,1000-5) #Olav Dalgard estimated 1 nurse treat 20 per year. SE based on assumption (wide uncertainty)  
pNurseOther<-rbeta(n,5,300-5) #Olav Dalgard estimated 1 nurse treat 20 per year. SE based on assumption (wide uncertainty)

#Calculate sub costs. Logic based on Oslo Economics report (Tollefsen et al.)

cCapFeePat<-cCapFee/nAvgVisit  
cGpConsult<-cCapFeePat+cFee2ad+cFee2dd  
cLabPck<-n707aLab\*cFee707a/pPaydByPat  
cLabPckRna<-cFee704e+nRnaPcr\*(cFee701b+cFee701c+cFee701e+cFee701g)+cFee704q+n707aLab\*cFee707a/pPaydByPat  
cUltraGal<-cRefUltra+cOwnUltra  
cGastro<-cDrg2016\*wDrg7110+cOwnOutput  
cAscites<-wDrg806P\*cDrg2016+cOwnOutput  
pChronMildTreat<-pChronTreat\*pMild  
pChronMildNo<-pChronTreat\*(1-pMild)  
pChronModTreat<-pChronTreat\*(1-pMild)  
pChronModNo<-pChronTreat\*(1-pMild)  
pCirrCompTreat<-pComp\*pChronTreat  
pCirrCompNo<-pComp\*(1-pChronTreat)  
pCirrDeComp<-pComp

#Calculate health state costs. Logic based on Oslo Economics report (Tollefsen et al.)

cSusceptible<-rep(0,n)  
chcVAcute<-nAcuteGp\*cGpConsult+nAcuteOutput\*wDrg907A\*cDrg2016+nAcuteLabR\*cLabPckRna  
chcVChronic<-pChronMildTreat\*(nMildTreatGp\*cGpConsult+nMildTreatOutput\*wDrg907A\*cDrg2016+nMildTreatLabRna\*cLabPckRna)+pChronMildNo\*(nMildNoLabRna\*cLabPckRna)+  
pChronModTreat\*(nModTreatGp\*cGpConsult+nModTreatOutput\*wDrg907A\*cDrg2016+nModTreatLabRna\*cLabPckRna+nModTreatLabPck\*cLabPck)+pChronModNo\*(nModNoLabRna\*cLabPckRna)  
cCirrHosis<-pCirrCompTreat\*  
(nCompTreatGp\*cGpConsult+nCompTreat907\*wDrg907A\*cDrg2016+nCompTreatLabRna\*cLabPckRna+nCompTreatLabPck\*cLabPck+nCompTreatUlt\*cUltraGal+nCompTreatGas\*cGastro)+  
pCirrCompNo\*(nCompNoGp\*cGpConsult+nCompNo907\*wDrg907A\*cDrg2016+nCompNoLabRna\*cLabPckRna+nCompNoLabPck\*cLabPck+nCompNoUlt\*cUltraGal+nCompNoGas\*cGastro)+  
pCirrDeComp\*  
(nDeCompGp\*cGpConsult+nDeComp907\*wDrg907A\*cDrg2016+nDeComp202\*wDrg202\*cDrg2016+nDeCompRna\*cLabPckRna+nDeCompLab\*cLabPck+nDeCompUlt\*cUltraGal+nDeCompGas\*cGastro+nDeCompAsc\*cAscites)  
cHcc<-nHccGp\*cGpConsult+nHcc856\*wDrg856G\*cDrg2016+cDrg2016\*(wDrg199\*nHcc199+wDrg203\*nHcc203)+nHccRna\*cLabPckRna+nHccLab\*cLabPck  
cTransplant<-nTrGp\*cGpConsult+nTr907\*wDrg907A\*cDrg2016+nTx202\*wDrg202\*cDrg2016+nTxRna\*cLabPckRna+nTxLab\*cLabPck  
cTransplanted<-nTxGp\*cGpConsult+nTx907\*wDrg907A\*cDrg2016+nTx202\*wDrg202\*cDrg2016+nTxRna\*cLabPckRna+nTxLab\*cLabPck  
cTreatedIvdu<-cNurse\*pNurseIvdu+cDoctor\*pDoctor  
cTreatedOther<-cNurse\*pNurseOther+cDoctor\*pDoctor

```
#Utilities
qSusceptibleMean<-0.747+0.09 #McLernon2008+McDonald2012
qSusceptibleSe<-0.03 #McDonald2012
qSusceptible<-rbeta(n,qSusceptibleMean*(qSusceptibleMean*(1-qSusceptibleMean)/(qSusceptibleSe^2)-1),(1-qSusceptibleMean)*((qSusceptibleMean/(qSusceptibleSe^2))*(1-qSusceptibleMean)-1))
qHcvAcuteMean<-0.747 #McLernon 2008
qHcvAcuteSe<-0.014 #McLernon 2008
qHcvAcute<-rbeta(n,qHcvAcuteMean*(qHcvAcuteMean*(1-qHcvAcuteMean)/(qHcvAcuteSe^2)-1),(1-qHcvAcuteMean)*((qHcvAcuteMean/(qHcvAcuteSe^2))*(1-qHcvAcuteMean)-1))
qHcvChronic<-qHcvAcute #McLernon 2008
qCirrhosisMean<-0.747-0.0142 #McLernon 2008
qCirrhosisSe<-0.017 #McLernon 2008
qCirrhosis<-rbeta(n,qCirrhosisMean*(qCirrhosisMean*(1-qCirrhosisMean)/(qCirrhosisSe^2)-1),(1-qCirrhosisMean)*((qCirrhosisMean/(qCirrhosisSe^2))*(1-qCirrhosisMean)-1))
qHccMean<-0.38 #Townsend 2011
qHccSe<-0.184 #Townsend 2011
qHcc<-rbeta(n,qHccMean*(qHccMean*(1-qHccMean)/(qHccSe^2)-1),(1-qHccMean)*((qHccMean/(qHccSe^2))*(1-qHccMean)-1))
qTransplantedMean<-0.747-0.038 #McLernon 2008
qTransplantedSe<-0.017 #McLernon 2008
qTransplanted<-rbeta(n,qTransplantedMean*(qTransplantedMean*(1-qTransplantedMean)/(qTransplantedSe^2)-1),(1-qTransplantedMean)*((qTransplantedMean/(qTransplantedSe^2))*(1-qTransplantedMean)-1))
```
